# Supplementary material
Source: ML conference proceedings conference paper supplement (https://openreview.net/forum?id=8OvST1bejm)
Supplement: supplementary_material [file Omitted_Proofs.pdf › Omitted_Proofs.pdf]

## A Omitted Proofs

**Theorem 7.** Let the crossover rate  $p_c \in [0, 1)$ ,  $\mu$  be the maximum size of parent population  $P$  with  $\mu > n/2$ , and  $\lambda$  the size of offspring population  $Q$  with  $\lambda = O(\mu)$ . Consider using Algorithm 1 with random selection, one-bit mutation or bit-wise mutation to generate  $P'$ , and survival selection with Property  $\mathcal{A}$ , to optimize  $\text{LF}'_\varepsilon$ . Then the expected number of fitness evaluations for achieving an additive  $\varepsilon$ -approximation w.r.t.  $\text{LF}'_\varepsilon$  is  $O(\mu n \log n)$ .

*Proof of Theorem 7.* From Lemma 4, we know that an additive  $\varepsilon$ -approximation of  $\text{LF}'_\varepsilon$  is reached if and only if, for each  $k \in [0..n/2]$ , the population includes a solution  $x$  such that  $|x'|_1 = k$ . As Property  $\mathcal{A}$  guarantees that once a  $k$  value is reached it will never be lost, we only need to consider the time to generate an individual with  $k$  1-bits in its first half bitstring. Consider a solution  $x$  such that  $|x'|_1 - |y'|_1 \neq 1$  for all  $y \in P$ . From Lemma 4, such a solution  $x$  always exists if and only if an additive  $\varepsilon$ -approximation has not been obtained. The probability of selecting  $x$  in single generation is at least

$$1 - \left(1 - \frac{1}{N}\right)^\lambda \geq 1 - e^{-\frac{\lambda}{N}} \geq \frac{\lambda}{N + \lambda},$$

where the last inequality uses  $e^a \geq 1 + a$ , for any  $a \in \mathbb{R}$ . Conditioned on selecting  $x$  as a parent, the probability to generate  $z$  with  $|z'|_1 = |x'|_1 + 1$  or  $|z'|_1 = |x'|_1 - 1$  is at least

$$\left(1 - \frac{1}{n}\right)^{n-1} (1 - p_c) \frac{\min\{|x'|_1, n/2 - |x'|_1\}}{n} \geq \frac{(1 - p_c) \min\{|x'|_1, n/2 - |x'|_1\}}{en}$$

for the bit-wise mutation, and is at least

$$(1 - p_c) \frac{\min\{|x'|_1, n/2 - |x'|_1\}}{n} > \frac{(1 - p_c) \min\{|x'|_1, n/2 - |x'|_1\}}{en}$$

for the one-bit mutation. Note that an individual with  $|x'|_1$  1-bits in its first half bitstring will exist in all future generations from Property  $\mathcal{A}$ . Then the expected number of iterations to generate such a  $z$  is at most

$$\left( \frac{\lambda}{N + \lambda} \frac{(1 - p_c) \min\{|x'|_1, n/2 - |x'|_1\}}{en} \right)^{-1} = \frac{en(N + \lambda)}{(1 - p_c)\lambda \min\{|x'|_1, n/2 - |x'|_1\}}.$$

Hence, to reach a population  $P$  with  $\{|y'|_1 \mid y \in P\} = [0..n/2]$ , it requires at most

$$en \frac{N + \lambda}{(1 - p_c)\lambda} \sum_{|x'|_1=0}^{n/2} \frac{1}{\min\{|x'|_1, n/2 - |x'|_1\}} \leq \frac{en(N + \lambda)}{(1 - p_c)\lambda} \sum_{|x'|_1=1}^{n/4+1} \frac{1}{|x'|_1} < \frac{en(N + \lambda)}{(1 - p_c)\lambda} \ln n$$

expected number of iterations, that is, at most  $\frac{en(N + \lambda)}{(1 - p_c)} \ln n$  expected number of fitness evaluations.  $\square$

**Lemma 8.** Let  $N \geq \frac{2n}{3} + 3$ . Consider using the NSGA-II with the survival selection based on the current crowding distance to optimize  $\text{LF}'_\varepsilon$  with problem size  $n$ . Assume that at some iteration  $t$ , the combined parent and offspring population  $R_t = P_t \cup Q_t$  contains an individual  $x$  with  $|x'|_1 = k$ , then the next parent population  $P_{t+1}$  also contains an individual  $y$  with  $|y'|_1 = k$ .

*Proof of Lemma 8.* Since all individuals in  $R_t$  are Pareto optimal from Lemma 3, we know that all individuals are in  $F_1$ , and then the selection of the next parent population  $P_{t+1}$  from  $R_t$  consists of  $N$  times removing an individual with the smallest current crowding distance, with ties broken randomly. Let  $R$  denote the set of individuals remaining from  $R_t$  at an arbitrary removal step and write  $r := |R| > N$ . We call a solution  $s \in R$  sole if the size of the multiset  $\{u \in R \mid |u'|_1 = |s'|_1\}$  is 1. We will prove that whenever such a sole solution  $s$  exists, there is always another solution  $z \in R$  whose crowding distance satisfies  $\text{cDis}(z) < \text{cDis}(s)$  and therefore  $s$  will be kept in the next removal. To this end, we first calculate a lower bound for  $\text{cDis}(s)$  and then upper bound  $\text{cDis}(z)$ .

Sort the individuals in  $R$  by increasing  $f_1$  values as  $x_1, \dots, x_r$  and by increasing  $f_2$  values as  $y_1, \dots, y_r$ . Since  $s$  is a sole solution, we further know

$$\{f_1(x_r) - f_1(x_1), f_2(y_r) - f_2(y_1)\} > 0. \quad (1)$$

Let  $i, j \in [1..r]$  such that  $s = x_i = y_j$ . If  $\{i, j\} \cap \{1, r\} \neq \emptyset$ , then  $\text{cDis}(s) = +\infty$ . Otherwise  $1 < i, j < r$ , and we compute

$$\text{cDis}(s) = \frac{f_1(x_{i+1}) - f_1(x_{i-1})}{f_1(x_r) - f_1(x_1)} + \frac{f_2(y_{j+1}) - f_2(y_{j-1})}{f_2(y_r) - f_2(y_1)}.$$

Since  $f_1(x) - f_1(y) \leq n\varepsilon$ , and  $f_2(x) - f_2(y) \leq n\varepsilon$  for any  $x, y \in \{0, 1\}^n$ , together with (1), we have

$$\text{cDis}(s) \geq \frac{f_1(x_{i+1}) - f_1(x_{i-1}) + f_2(y_{j+1}) - f_2(y_{j-1})}{n\varepsilon}. \quad (2)$$

If  $\min\{|s'|_0, |s'|_1\} < \sqrt{n}$ , for the worst case where  $\min\{|x'_{i+1}|_0, |x'_{i+1}|_1\} \geq \sqrt{n}$ ,  $\min\{|x'_{i-1}|_0, |x'_{i-1}|_1\} < \sqrt{n}$ ,  $\min\{|y'_{j+1}|_0, |y'_{j+1}|_1\} < \sqrt{n}$ , and  $\min\{|y'_{j-1}|_0, |y'_{j-1}|_1\} \geq \sqrt{n}$ , we have

$$f_1(x_{i+1}) - f_1(x_{i-1}) + f_2(y_{j+1}) - f_2(y_{j-1}) \geq (4 + 4 - 1 + 2^{-n/2}) \cdot \varepsilon.$$

Then (2) gives

$$\text{cDis}(s) \geq \frac{(4 + 4 - 1 + 2^{-n/2}) \cdot \varepsilon}{n\varepsilon} > \frac{7}{n}.$$

Similarly, if  $\min\{|s'|_0, |s'|_1\} \geq \sqrt{n}$ , we pessimistically consider the case where  $\min\{|x'_{i+1}|_0, |x'_{i+1}|_1\} \geq \sqrt{n}$ ,  $\min\{|x'_{i-1}|_0, |x'_{i-1}|_1\} \geq \sqrt{n}$ ,  $\min\{|y'_{j+1}|_0, |y'_{j+1}|_1\} \geq \sqrt{n}$ , and  $\min\{|y'_{j-1}|_0, |y'_{j-1}|_1\} \geq \sqrt{n}$ , then we have

$$f_1(x_{i+1}) - f_1(x_{i-1}) + f_2(y_{j+1}) - f_2(y_{j-1}) \geq (3 + 2^{-n/2} + 3 + 2^{-n/2}) \cdot \varepsilon.$$

Hence, (2) gives

$$\text{cDis}(s) \geq \frac{(3 + 2^{-n/2} + 3 + 2^{-n/2}) \cdot \varepsilon}{n\varepsilon} > \frac{6}{n}.$$

Therefore, for a sole solution  $s$ , we have

$$\text{cDis}(s) > \frac{6}{n}. \quad (3)$$

Next, we estimate the sum of the finite crowding distances over the individuals in  $R$  to prove the existence of a solution  $z \in R$  with  $\text{cDis}(z) < \text{cDis}(s)$ . We compute

$$\begin{aligned} \sum_{i=2}^{r-1} (f_1(x_{i+1}) - f_1(x_{i-1})) &= f_1(x_r) + f_1(x_{r-1}) - f_1(x_2) - f_1(x_1) \\ &\leq 2(f_1(x_r) - f_1(x_1)). \end{aligned}$$

An analogous estimate holds for  $f_2$ . Hence, we have

$$\begin{aligned} \sum_{x \in R^*} \text{cDis}(x) &\leq \frac{\sum_{i=2}^{r-1} (f_1(x_{i+1}) - f_1(x_{i-1}))}{f_1(x_r) - f_1(x_1)} + \frac{\sum_{j=2}^{r-1} (f_2(y_{j+1}) - f_2(y_{j-1}))}{f_2(y_r) - f_2(y_1)} \\ &\leq \frac{2(f_1(x_r) - f_1(x_1))}{f_1(x_r) - f_1(x_1)} + \frac{2(f_2(y_r) - f_2(y_1))}{f_2(y_r) - f_2(y_1)} = 4, \end{aligned} \quad (4)$$

where  $R^*$  denotes the individuals in  $R$  with finite crowding distances. By definition of crowding distance, at most 4 individuals have an infinite value of crowding distance, implying  $|R^*| \geq r - 4$ . Then with (4), an averaging argument implies that there exists at least one solution  $z \in R^*$  with

$$\text{cDis}(z) \leq \frac{4}{|R^*|} \leq \frac{4}{r-4} \leq \frac{4}{N-3} \leq \frac{6}{n},$$

where the third inequality uses  $r = |R| \geq N + 1$ , and the last inequality uses  $N \geq \frac{2}{3}n + 3$ . Together with (3), we now proved the existence of  $z \in R$  with  $\text{cDis}(z) < \text{cDis}(s)$ , if a sole solution  $s$  exists. Hence, among all removal steps in the survival selection, we will never see a sole solution be removed, thus we will never see  $\{u \in R \mid |u'|_1 = |x'|_1\}$  be removed to empty. Then this lemma is proved.  $\square$

**Lemma [10].** Let  $N = N_r \geq 2n + 3$  and a given positive threshold  $\epsilon_{nad} \geq n\epsilon$ . Consider using the NSGA-III to optimize  $\text{LF}'_\epsilon$  with problem size  $n$ . Define  $z_j^{\min} := \min\{f_j(x) \mid x \in R_t\}$  and  $z_j^{\max} := \max\{f_j(x) \mid x \in R_t\}$ ,  $j = 1, 2$ . Then the next parent population  $P_{t+1}$  will preserve two individuals  $x, y$  such that  $f_1(x) = z_1^{\min}$  and  $f_1(y) = z_1^{\max}$ .

*Proof of Lemma [10]* Similar to [DZD25] Lemma 4], we establish our proof based on the following facts.

- Fact I: Any two different function values are incomparable w.r.t.  $\text{LF}'_\epsilon$ .
- Fact II: Any individual  $z$  with  $f_1(z) = z_1^{\min}$  will have  $f_2(z) = z_2^{\max}$ , and  $z$  with  $f_1(z) = z_1^{\max}$  will have  $f_2(z) = z_2^{\min}$ .
- Fact III: The ideal point estimate  $\hat{z}^* = (z_1^{\min}, z_2^{\min})$ , and the Nadir point estimate  $\hat{z}^{\text{nad}} = (z_1^{\max}, z_2^{\max})$ .
- Fact IV: In each generation, for any reference point with associated individual(s) in the critical front  $F_{i^*}$ , one of its individual(s) in  $F_{i^*}$  with minimal distance will survive to the next generation.

Fact III results in that the normalized function value  $f^n(x) = (f_1^n(x), f_2^n(x))$  of an individual  $x$  is  $f_j^n(x) = \frac{f_j(x) - z_j^{\min}}{z_j^{\max} - z_j^{\min}}$ ,  $j = 1, 2$ . Then, with Fact II, we know that any individual  $z$  with  $f(z) = (z_1^{\min}, z_2^{\max})$  or  $f(z) = (z_1^{\max}, z_2^{\min})$  will be normalized to  $(0, 1)$  or  $(1, 0)$  respectively, and then will be associated to the reference point  $(0, 1)$  or  $(1, 0)$  respectively. Together with  $i^* = 1$ , that is, all individuals are in  $F_1$ , from Fact I, Fact IV shows that the reference points  $(0, 1)$  and  $(1, 0)$  will have their associated  $x$  and  $y$  into  $P_{t+1}$ . Then this lemma is proved.

Note that Fact IV has already been proved in [DZD25] Lemma 4], stemming from the survival selection mechanism of the NSGA-III. Also note that Fact II is a direct corollary of the easy-to-obtain Fact I.  $\hat{z}^*$  in Fact III is obvious from the definitions of  $z_1^{\min}$ ,  $z_2^{\min}$ , and  $\hat{z}^*$ . For  $\hat{z}^{\text{nad}}$ , from the procedure of the normalization, we know that either  $\hat{z}_j^{\text{nad}} = \max_{x \in F_1} f_j(x)$  or  $\hat{z}_j^{\text{nad}} = I_j$ . For the first case,  $\hat{z}_j^{\text{nad}} = z_j^{\max}$ ,  $j = 1, 2$ , is obtained. For the second case,  $I_j \geq \epsilon_{nad}$  and  $I_j \leq z_j^{\max}$ . Since  $\epsilon_{nad} \geq n\epsilon$  from our assumption and  $z_j^{\max} \leq n\epsilon$  from the definition of  $\text{LF}'_\epsilon$ , we know that  $I_j = \epsilon_{nad} = z_j^{\max} = n\epsilon$ . Thus,  $\hat{z}_j^{\text{nad}} = I_j = z_j^{\max}$ .  $\square$

**Lemma [11].** Let  $N = N_r \geq 2n + 3$  and  $\epsilon_{nad} \geq n\epsilon$ . Consider using the NSGA-III to optimize  $\text{LF}'_\epsilon$  with problem size  $n$ . Assume that at some iteration  $t$ , the two extreme points  $(0, n\epsilon)$  and  $(n\epsilon, 0)$  are covered by the combined parent and offspring population  $R_t = P_t \cup Q_t$ . If  $R_t$  contains an individual  $x$  with  $|x'|_1 = k$ , then the next parent population  $P_{t+1}$  also contains an individual  $\tilde{x}$  with  $|\tilde{x}'|_1 = k$ , and covers  $(0, n\epsilon)$  and  $(n\epsilon, 0)$  as well.

*Proof of Lemma [11]* We prove this lemma by showing that all individuals associated with the same reference point will have a same number of 1-bits in the first half of their bit-strings. That is, the individual  $x$  with  $|x'|_1 = k$  will be associated to a reference point any of whose associated individuals, say  $z$ , has  $|z'|_1 = k$ . From Fact IV in the proof of Lemma [10], we know that this reference point will contribute a satisfying  $\tilde{x}$  to  $P_{t+1}$ .

To show the above statement, we will prove that any two individuals  $x$  and  $y$  with  $|x'|_1 \neq |y'|_1$  will be associated to different reference points. Since  $(0, n\epsilon)$  and  $(n\epsilon, 0)$  are covered by  $R_t$ , we know the normalized  $f_j^n(x) = \frac{f_j(x) - z_j^{\min}}{z_j^{\max} - z_j^{\min}} = \frac{f_j(x) - 0}{n\epsilon - 0} = \frac{f_j(x)}{n\epsilon}$  and  $f_j^n(y) = \frac{f_j(y)}{n\epsilon}$ ,  $j = 1, 2$ , from the procedure of the normalization and Fact III in the proof of Lemma [10]. Say  $(\frac{m}{N_r - 1}, 1 - \frac{m}{N_r - 1})$ ,  $m \in [0, N_r - 1]$  the  $m$ -th reference point. Then  $(0, n\epsilon)$  and  $(n\epsilon, 0)$  are associated to 0-th and  $(N_r - 1)$ -th reference points respectively. From

$$\frac{1 - \frac{m_x}{N_r - 1}}{\frac{m_x}{N_r - 1}} = \frac{f_2^n(x)}{f_1^n(x)}$$

with  $f_1(x) \neq 0$ , we have

$$m_x = \frac{N_r - 1}{1 + \frac{f_2^n(x)}{f_1^n(x)}} = \frac{N_r - 1}{1 + \frac{f_2(x)}{f_1(x)}}.$$

Then  $x$  will be associated to  $\lfloor m_x \rfloor$ -th or  $\lceil m_x \rceil$ -th reference point. Analogously,  $y$  will be associated to  $\lfloor m_y \rfloor$ -th or  $\lceil m_y \rceil$ -th reference point, where  $m_y = \frac{N_r - 1}{1 + \frac{f_2(y)}{f_1(y)}}$ . W.l.o.g. let  $|x'|_1 > |y'|_1$ . If  $|y'|_1 > 0$ , then  $f_1(y) \neq 0$  and  $f_1(x) \neq 0$ . From an easy-to-obtain fact that  $f_1(x) > f_1(y) > 0$  and  $f_2(y) > f_2(x) \geq 0$  for  $|x'|_1 > |y'|_1 > 0$ , we know that  $\frac{f_2(x)}{f_1(x)} < \frac{f_2(y)}{f_1(y)}$ . Then

$$\begin{aligned} |m_x - m_y| &= \left| \frac{N_r - 1}{1 + \frac{f_2(x)}{f_1(x)}} - \frac{N_r - 1}{1 + \frac{f_2(y)}{f_1(y)}} \right| = \frac{N_r - 1}{1 + \frac{f_2(x)}{f_1(x)}} - \frac{N_r - 1}{1 + \frac{f_2(y)}{f_1(y)}} \\ &\geq \frac{N_r - 1}{1 + \frac{(2|x'|_0 + 2^{-n/2}BV(\bar{x}''))\varepsilon}{2|x'|_1\varepsilon}} - \frac{N_r - 1}{1 + \frac{2|y'|_0\varepsilon}{(2|y'|_1 + 2^{-n/2}BV(y''))\varepsilon}} \\ &> \frac{N_r - 1}{1 + \frac{2|x'|_0 + 1}{2|x'|_1}} - \frac{N_r - 1}{1 + \frac{2|y'|_0}{2|y'|_1 + 1}} \\ &= \frac{N_r - 1}{n + 1} (2|x'|_1 - 2|y'|_1 - 1) \\ &\geq \frac{2n + 3 - 1}{n + 1} = 2, \end{aligned}$$

where the first inequality uses  $f_2(x) \leq (2|x'|_0 + 2^{-n/2}BV(\bar{x}''))\varepsilon$ ,  $f_1(x) \geq 2|x'|_1\varepsilon$ ,  $f_2(y) \geq 2|y'|_0\varepsilon$ , and  $f_1(y) \leq (2|y'|_1 + 2^{-n/2}BV(y''))\varepsilon$  from the definitions of  $f_1$  and  $f_2$ , the second inequality uses  $\{BV(\bar{x}''), BV(y'')\} < 2^{-n/2}$ , the third equality uses  $|x'|_1 + |x'|_0 = \frac{n}{2} = |y'|_1 + |y'|_0$ , and the last inequality uses  $N_r \geq 2n + 3$  and  $|x'|_1 - |y'|_1 \geq 1$ . If  $|y'|_1 = 0$ , then analogously, we have

$$|m_x - 0| = m_x = \frac{N_r - 1}{1 + \frac{f_2(x)}{f_1(x)}} > 2.$$

Then we know that at least two reference points lie between  $x$  and  $y$ . Thus  $x$  and  $y$  will be associated to different reference points, and this lemma is proved.  $\square$

**Theorem (I2).** Let  $N = N_r \geq 2n + 3$ ,  $\epsilon_{nad} \geq n\varepsilon$  and  $p_c \in [0, 1)$ . Consider using the NSGA-III with uniform selection and one-bit mutation or bit-wise mutation to optimize  $\text{LF}'_\varepsilon$  with problem size  $n$ . Then after an expected number of  $O(Nn \log n)$  fitness evaluations, the population achieves an additive  $\varepsilon$ -approximation of  $\text{LF}'_\varepsilon$ .

*Proof of Theorem I2* Assume that at some time  $t_0$ , the population contains two solutions  $x, y$  such that  $|x'|_1 = n/2$  and  $|y'|_1 = 0$ , this is  $(0, n\varepsilon)$  and  $(n\varepsilon, 0)$  are covered. Then from Lemma 11, we know that Property  $\mathcal{A}$  will be satisfied in current and all future generations. Thus Theorem 7 will result in additional  $O(Nn \log n)$  expected number of fitness evaluations to reach an additive  $\varepsilon$ -approximation of  $\text{LF}'_\varepsilon$  from time  $t_0$ .

In the following, we only need to analyze the time  $t_0$  required to generate such solutions  $x$  and  $y$ . Let  $x_{\max}$  denote an individual in the population with the maximum number of 1-bits in its first half bitstring. Then the probability to generate an offspring in  $S_{\max} := \{z \mid |z'|_1 > |x'_{\max}|_1\}$  is at least

$$(1 - p_c) \left( 1 - \left( 1 - \frac{1}{N} \right)^N \right) \frac{\frac{n}{2} - |x'_{\max}|_1}{n} \left( 1 - \frac{1}{n} \right)^{n-1} \geq (1 - p_c) \left( 1 - \frac{1}{e} \right) \frac{n - 2|x'_{\max}|_1}{2en}.$$

As  $f_1(z)$  increases as  $|z'|_1$  increases, from Lemma 10, we know that one offspring in  $S_{\max}$  (the one with maximal number of 1-bits in the first half bitstring) will survive to the next generation. As  $z_1^{\min}$  will not decrease from Lemma 10,  $|x'_{\max}|_1$  will not decrease. Hence, the expected number of iterations to generate an offspring in  $S_{\max}$  is at most

$$\frac{1}{(1 - p_c) \left( 1 - \frac{1}{e} \right) \frac{n - 2|x'_{\max}|_1}{2en}} = \frac{2e^2 n}{(1 - p_c)(e - 1)(n - 2|x'_{\max}|_1)}.$$

Therefore, to reach an  $x$  with  $|x'|_1 = n/2$ , we need at most

$$\sum_{k=0}^{\frac{n}{2}-1} \frac{2e^2 n}{(1-p_c)(e-1)(n-2k)} = O(n \log n)$$

expected number of iterations. Analogously, the same bound of  $O(n \log n)$  holds for generating a  $y$  with  $|y'|_1 = 0$ . Therefore,  $E[t_0] = O(n \log n)$ , and the expected number of fitness evaluations to cover  $(0, n\varepsilon)$  and  $(n\varepsilon, 0)$  is  $O(Nn \log n)$ . Together with the additional  $O(Nn \log n)$  expected number of fitness evaluations for an additive  $\varepsilon$ -approximation, this lemma is proved.  $\square$

**Lemma (13).** *Let  $N \geq \frac{n}{2} + 3$  and  $r = (r_1, r_2)$  with  $r_1 \leq -\varepsilon$ ,  $r_2 \leq -\varepsilon$ . Consider using the SMS-EMOA to optimize  $\text{LF}'_\varepsilon$  with problem size  $n$ . Assume that at some iteration  $t$  the combined parent and offspring population  $R_t$  contains an individual  $x$  with  $|x'|_1 = k$ , then the next parent population  $P_{t+1}$  contains an individual  $y$  that  $|y'|_1 = k$ .*

*Proof of Lemma 13* Recall the definition of a sole solution  $s$  in the proof of Lemma 8, that is, the size of the multiset  $\{z \in R_t \mid |z'|_1 = |s'|_1\}$  is 1. Since the SMS-EMOA only deletes one individual in  $R_t$  for the survival selection, we easily know that this lemma holds if  $x$  is not a sole solution. Hence, we only consider the case when  $x$  is a sole solution. As the survival selection removes one individual with smallest hypervolume contribution, we only need to prove that there is another solution  $z \in R_t$  with  $\Delta_r(z, R_t) < \Delta_r(x, R_t)$ .

Let  $s_1, \dots, s_{N+1}$  be the solutions in  $R_t$  sorted by increasing  $f_1$  values (and hence by decreasing  $f_2$  values). Then

$$\Delta_r(s_i, R_t) = \begin{cases} (f_1(s_1) - r_1)(f_2(s_1) - f_2(s_2)), & i = 1, \\ (f_1(s_{i+1}) - f_1(s_i))(f_2(s_{i-1}) - f_2(s_i)), & i \in [2..N], \\ (f_1(s_{N+1}) - f_1(s_N))(f_2(s_{N+1}) - r_2), & i = N + 1. \end{cases} \quad (5)$$

If  $x = s_1$ , together with  $r_1 \leq -\varepsilon$ , then

$$\Delta_r(x, R_t) = (\text{LF}'_{\varepsilon,1}(x) - r_1)(\text{LF}'_{\varepsilon,2}(x) - \text{LF}'_{\varepsilon,2}(s_2)) \geq (0 - r_1) \cdot 2\varepsilon \geq 2\varepsilon^2. \quad (6)$$

Similarly, if  $x = s_{N+1}$ , together with  $r_2 \leq -\varepsilon$ , then

$$\Delta_r(x, R_t) = (\text{LF}'_{\varepsilon,1}(s_{N+1}) - \text{LF}'_{\varepsilon,1}(s_N))(\text{LF}'_{\varepsilon,2}(s_{N+1}) - r_2) \geq 2\varepsilon \cdot (0 - r_2) \geq 2\varepsilon^2. \quad (7)$$

Otherwise, let  $\tilde{i} \in [2..N]$  such that  $x = s_{\tilde{i}}$ . If  $\min\{|x'|_0, |x'|_1\} < \sqrt{n}$ , from (5) and Definition 2 we pessimistically consider that  $\min\{|s'_{\tilde{i}-1}|_0, |s'_{\tilde{i}-1}|_1\} < \sqrt{n}$  and  $\min\{|s'_{\tilde{i}+1}|_0, |s'_{\tilde{i}+1}|_1\} \geq \sqrt{n}$ , and have

$$\begin{aligned} \Delta_r(x, R_t) &\geq \left( (2|s'_{\tilde{i}+1}|_1 + 2^{-n/2}BV(s''_{\tilde{i}+1}))\varepsilon - 2|x'|_1\varepsilon \right) \cdot \left( 2|s'_{\tilde{i}-1}|_0\varepsilon - 2|x'|_0\varepsilon \right) \\ &\geq (1 + 2^{-n/2})\varepsilon \cdot 2\varepsilon > 2\varepsilon^2. \end{aligned} \quad (8)$$

Analogously, for  $\min\{|x'|_0, |x'|_1\} \geq \sqrt{n}$ , we pessimistically consider that  $\min\{|s'_{\tilde{i}-1}|_0, |s'_{\tilde{i}-1}|_1\} \geq \sqrt{n}$  and  $\min\{|s'_{\tilde{i}+1}|_0, |s'_{\tilde{i}+1}|_1\} \geq \sqrt{n}$ , and obtain

$$\begin{aligned} \Delta_r(x, R_t) &\geq \left( (2|s'_{\tilde{i}+1}|_1 + 2^{-n/2}BV(s''_{\tilde{i}+1}))\varepsilon - (2|x'|_1 + 2^{-n/2}BV(x''))\varepsilon \right) \\ &\quad \cdot \left( (2|s'_{\tilde{i}-1}|_0 + 2^{-n/2}BV(\overline{s''_{\tilde{i}-1}}))\varepsilon - (2|x'|_0 + 2^{-n/2}BV(\overline{x''}))\varepsilon \right) \\ &\geq (2 - 2^{-n/2}BV(x''))\varepsilon \cdot (2 - 2^{-n/2}BV(\overline{x''}))\varepsilon > 2\varepsilon^2. \end{aligned} \quad (9)$$

With (6)-(9), we know the hypervolume contribution of a sole solution  $s$

$$\Delta_r(x, R_t) \geq 2\varepsilon^2.$$

Now we will show that  $R_t$  contains a solution  $z$  with  $\Delta_r(z, R_t) < 2\varepsilon^2 < \Delta_r(x, R_t)$ . Note that for any  $u \in \{0, 1\}^n$ ,  $|u'|_1$  takes its value from  $[0..n/2]$ , a set with size  $n/2 + 1$ . Since  $R_t$  has  $N + 1 \geq n/2 + 4$  (indeed  $n/2 + 2$  is enough) from our assumption  $N \geq n/2 + 3$  ( $N \geq n/2 + 1$  is

sufficient as well), the pigeonhole principle shows that there is a solution  $s \in R_t$  such that the multiset  $S := \{a \in R_t \mid |a'|_1 = |s'|_1\}$  has its size at least 2. If  $\min\{|s'|_0, |s'|_1\} < \sqrt{n}$ , from Definition 2 we know that for any  $u, v \in S$ ,  $f(u) = f(v)$ . Then setting  $z = s$ , we have  $\Delta_r(z, R_t) = 0$ .

If  $\min\{|s'|_0, |s'|_1\} \geq \sqrt{n}$ , let  $j \in [1..N + 1]$  such that  $|s'|_1 = |s'_j|_1$ , and rewrite  $S = \{s_{j_a}, s_{j_a+1}, \dots, s_{j_b}\}$  with  $j_a \leq j \leq j_b$  and  $j_b - j_a \geq 2$ . For the case when  $j_b - j_a \geq 3$ , we set  $z = s_{j_a+1}$ , and we have

$$\begin{aligned} \Delta_r(z, R_t) &\leq \left( (2|s'_{j_b}|_1 + 2^{-n/2}BV(s''_{j_b}))\varepsilon - (2|z'|_1 + 2^{-n/2}BV(z''))\varepsilon \right) \\ &\quad \cdot \left( (2|s'_{j_a}|_0 + 2^{-n/2}BV(\overline{s''_{j_a}}))\varepsilon - (2|z'|_0 + 2^{-n/2}BV(\overline{z''}))\varepsilon \right) \\ &\leq (1 - 2^{-n/2} - 2^{-n/2}BV(z''))\varepsilon \cdot (1 - 2^{-n/2} - 2^{-n/2}BV(\overline{z''}))\varepsilon \\ &\leq \left( \frac{2 - 1 - 2^{-n/2}}{2} \right)^2 \varepsilon^2 \leq \frac{\varepsilon^2}{4}. \end{aligned}$$

For the case when  $j_b - j_a = 2$ , we set  $z = s_{j_b}$  if  $j_b \in [2..N]$  and  $z = s_{j_a}$  if  $j_a \in [2..N]$ , and we simply denote  $z = s_j$  here. We pessimistically consider the case where both neighbors of  $z$  satisfy  $\min\{|z'_{j+1}|_0, |z'_{j+1}|_1\} \geq \sqrt{n}$  and  $\min\{|z'_{j-1}|_0, |z'_{j-1}|_1\} \geq \sqrt{n}$ , then we have

$$\begin{aligned} \Delta_r(z, R_t) &= \left( (2|s'_{j+1}|_1 + 2^{-n/2}BV(s''_{j+1}))\varepsilon - (2|z'|_1 + 2^{-n/2}BV(z''))\varepsilon \right) \\ &\quad \cdot \left( (2|s'_{j-1}|_0 + 2^{-n/2}BV(\overline{s''_{j-1}}))\varepsilon - (2|z'|_0 + 2^{-n/2}BV(\overline{z''}))\varepsilon \right) \\ &\leq (3 - 2^{-n/2} - 2^{-n/2}BV(z''_i))\varepsilon \cdot (1 - 2^{-n/2} - 2^{-n/2}BV(\overline{z''}))\varepsilon \\ &\leq 2\varepsilon \cdot (1 - 2^{-n/2})\varepsilon < 2\varepsilon^2. \end{aligned}$$

□

**Lemma 15.** Let  $N \geq n/2 + 2$ . Consider using the SPEA2 to optimize  $\text{LF}'_\varepsilon$  with problem size  $n$ . If at some iteration, the combined population  $R_t$  contains an individual  $x$  with  $|x'|_1 = k$ , then the next population  $P_{t+1}$  will also include an individual  $y$  with  $|y'|_1 = k$ .

*Proof of Lemma 15.* Since all solutions in  $R_t$  are mutually non-dominated, we know that  $|R_t| = N + \lambda > N$ , and the truncation operator will iteratively remove solutions in  $R_t$  for  $\lambda$  times (See Step 5 in Algorithm 8). Let  $R$  denote the set of remaining individuals during this process until  $\lambda$  solutions are removed, and let  $S = \{s \in R \mid |s'|_1 = |x'|_1\}$ . Then we only need to prove that  $S$  will not be empty after the survival selection. Thus we only focus on the case when  $S$  decreases to 1, that is,  $x \in S$  is a sole solution. We will prove that there always exists a  $z \in R$  such that  $\sigma_z^1 < \sigma_x^1$ . Then by the truncation operator, we know an individual with smallest value of  $\sigma^1$  will be removed (thus  $x$  will be kept) in the survival selection.

Let  $s$  be the nearest neighbor of a sole solution  $x$ . We have

$$\sigma_x^1 = \sqrt{(\text{LF}'_{\varepsilon,1}(s) - \text{LF}'_{\varepsilon,1}(x))^2 + (\text{LF}'_{\varepsilon,2}(s) - \text{LF}'_{\varepsilon,2}(x))^2}.$$

If  $\min\{|s'|_0, |s'|_1\} < \sqrt{n}$  and  $\min\{|x'|_0, |x'|_1\} < \sqrt{n}$ , then

$$\begin{aligned} \sigma_x^1 &= \sqrt{(2|s'|_1\varepsilon - 2|x'|_1\varepsilon)^2 + (2|s'|_0\varepsilon - 2|x'|_0\varepsilon)^2} \\ &\geq \sqrt{(2\varepsilon)^2 + (2\varepsilon)^2} \geq 2\sqrt{2}\varepsilon. \end{aligned}$$

If  $\min\{|s'|_0, |s'|_1\} < \sqrt{n}$  and  $\min\{|x'|_0, |x'|_1\} \geq \sqrt{n}$ , then

$$\begin{aligned} \sigma_x^1 &= \sqrt{\left( (2|s'|_1\varepsilon - (2|x'|_1 - 2^{-n/2}BV(x''))\varepsilon)^2 \right. \\ &\quad \left. + (2|s'|_0\varepsilon - (2|x'|_0 - 2^{-n/2}BV(\overline{x''}))\varepsilon)^2 \right)} \\ &\geq \sqrt{(2\varepsilon)^2 + ((2 - 1 + 2^{-n/2})\varepsilon)^2} > \sqrt{5}\varepsilon. \end{aligned}$$

Analogously,  $\sigma_x^1 > \sqrt{5}\varepsilon$  also holds if  $\min\{|s'|_0, |s'|_1\} \geq \sqrt{n}$  and  $\min\{|x'|_0, |x'|_1\} < \sqrt{n}$ . If  $\min\{|s'|_0, |s'|_1\} \geq \sqrt{n}$  and  $\min\{|x'|_0, |x'|_1\} \geq \sqrt{n}$ , then

$$\begin{aligned}\sigma_s^1 &= \sqrt{\left((2|s'|_1 - 2^{-n/2}BV(s''))\varepsilon - (2|x'|_1 - 2^{-n/2}BV(x''))\varepsilon\right)^2 \\ &\quad + \left((2|s'|_0 - 2^{-n/2}BV(s''))\varepsilon - (2|x'|_0 - 2^{-n/2}BV(\overline{x''))\varepsilon\right)^2} \\ &\geq \sqrt{\left((2-1+2^{-n/2})\varepsilon\right)^2 + \left((2-1+2^{-n/2})\varepsilon\right)^2} > \sqrt{2}\varepsilon.\end{aligned}$$

Therefore, we have

$$\sigma_s^1 > \sqrt{2}\varepsilon.$$

Now, we will show the existence of a solution  $z \in R$  with  $\sigma_z^1 < \sqrt{2}\varepsilon$ . Since the population size  $N \geq \frac{n}{2} + 1$ , there are two solutions  $u$  and  $v$  with  $|u'|_1 = |v'|_1$  (and hence  $|u'|_0 = |v'|_0$ ). Let  $\sigma_{u,v}$  denote the distance between  $LF'_\varepsilon(u)$  and  $LF'_\varepsilon(v)$ . If  $\min\{|u'|_0, |u'|_1\} < \sqrt{n}$ , we know that  $(LF'_{\varepsilon,1}(u), LF'_{\varepsilon,2}(u)) = (LF'_{\varepsilon,1}(v), LF'_{\varepsilon,2}(v))$ , then  $\sigma_{u,v}$  is 0. If  $\min\{|u'|_0, |u'|_1\} \geq \sqrt{n}$ , we have

$$\begin{aligned}\sigma_{u,v} &= \sqrt{\left((2|u'|_1 - 2^{-n/2}BV(u''))\varepsilon - (2|v'|_1 - 2^{-n/2}BV(v''))\varepsilon\right)^2 \\ &\quad + \left((2|u'|_0 - 2^{-n/2}BV(u''))\varepsilon - (2|v'|_0 - 2^{-n/2}BV(\overline{v''))\varepsilon\right)^2} \\ &\leq \sqrt{\left((1-2^{-n/2})\varepsilon\right)^2 + \left((1-2^{-n/2})\varepsilon\right)^2} < \sqrt{2}\varepsilon.\end{aligned}$$

Recalling the definitions of  $\sigma_u^1$ ,  $\sigma_v^1$ , and  $\sigma_{u,v}$ , we have  $\sigma_u^1 \leq \sigma_{u,v}$  and  $\sigma_v^1 \leq \sigma_{u,v}$ . With  $z$  being one of the two solutions, we proved this lemma.  $\square$
